# Supplementary material for: Lattice distortion and orbital hybridization in NdFeO3–PbTiO3 ferroelectric thin films
Source: Royal Society of Chemistry journal article supplement (doi:10.1039/c5dt03611a), 2015-12-09
Supplement: c5dt03611a1.pdf [file c5dt03611a1.pdf]

## Lattice distortion and orbital hybridization in $\text{NdFeO}_3$ - $\text{PbTiO}_3$ ferroelectric thin films

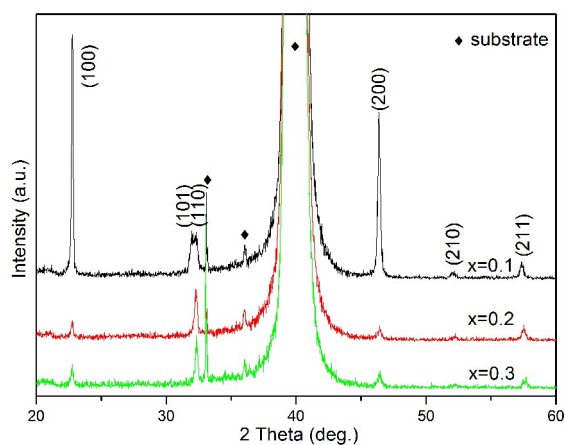

Fig. S1 Conventional powder XRD patterns of NF-PT thin films.

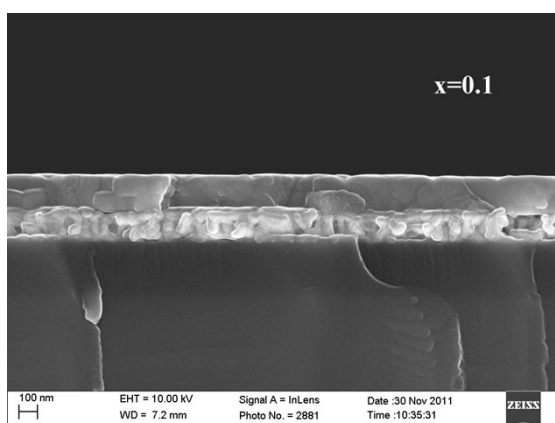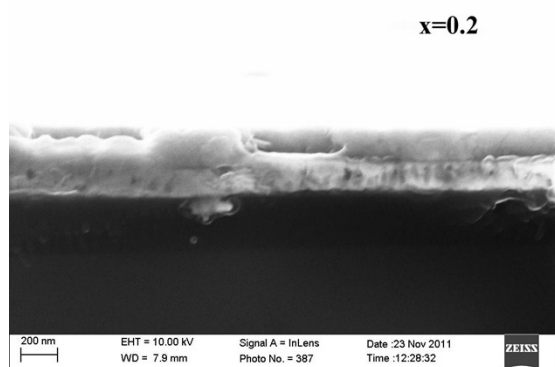

$x=0.3$

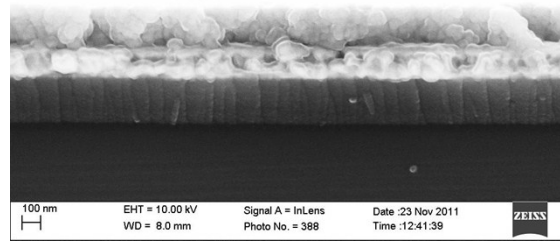

Fig. S2 Cross-sectional FE-SEM images of NF-PT thin films

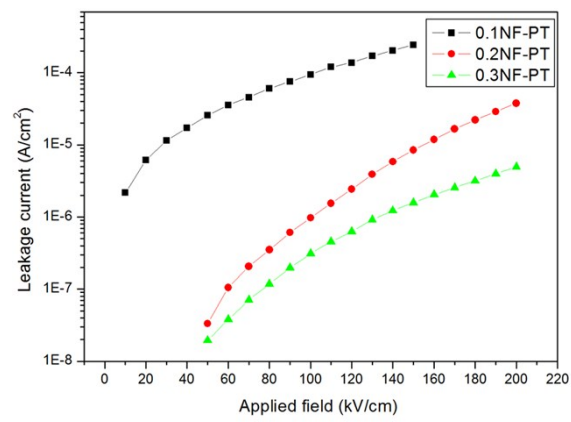

Fig. S3 Leakage current intensity of NF-PT thin films
